# Supplementary material for: A Role for Rebinding in Rapid and Reliable T Cell Responses to Antigen
Source: PubMed Central journal article supplement (PMC2775163; doi:10.1371/journal.pcbi.1000578), 2009-11-26
Supplement: pcbi.1000578.s007.pdf [file pcbi.1000578.s007.pdf]

## Text S3. Effects of endogenous pMHC

We modify the ODE model presented in the main text to investigate the effects of a large concentration of identical pMHC molecules. In this calculation, we assume the contact interface to be a flat disc (radius  $5 \mu\text{m}$ ) containing a pMHC concentration of  $M = 500 \mu\text{m}^{-2}$  and a TCR concentration of  $R = 100 \mu\text{m}^{-2}$ . We first reformulate the model from the perspective of a single TCR interacting with a homogeneous pMHC distribution. Next, we use this modified model to calculate the probability of productive signaling for a single TCR and assuming TCR do not compete for pMHC (i.e.  $M \gg R$ ), we calculate the probability that at least 1 TCR (out of 7854) at the T cell-APC contact interface has transduced a productive signal from interacting with 39270 pMHC.

In this model, we introduce additional states, denoted as  $\hat{U}_j$ , that track the probability of finding a TCR without pMHC (i.e. once it diffuses away) in an intermediate state. In this state, a different pMHC may bind TCR and resume signaling from where a previous pMHC left off (provided  $\mu$  is sufficiently small). The ODE system describing this modified model is,

$$\begin{aligned}
 \partial B_0 / \partial t &= -\bar{k}_{\text{on}}^c B_0 + k_{\text{off}}^c B_0^c + k_{\text{on}} U_0 - (k_{\text{off}} + k_{\text{p}}) B_0 \\
 \partial B_0^c / \partial t &= \bar{k}_{\text{on}}^c B_0 - k_{\text{off}}^c B_0^c + k_{\text{on}} U_0^c - (k_{\text{off}} + k_{\text{p}}) B_0^c \\
 \partial U_0 / \partial t &= -\bar{k}_{\text{on}}^c U_0 + k_{\text{off}}^c U_0^c - (k_- + \bar{k}_{\text{on}}) U_0 + k_+ M \hat{U}_0 + k_{\text{off}} B_0 + \mu \sum_{j=1}^{S-1} U_j \\
 \partial U_0^c / \partial t &= \bar{k}_{\text{on}}^c U_0 - k_{\text{off}}^c U_0^c - \bar{k}_{\text{on}} U_0^c + k_{\text{off}} B_0^c + \mu \sum_{j=1}^{S-1} U_j^c \\
 \partial \hat{U}_0 / \partial t &= k_- U_0 - k_+ M \hat{U}_0 + \mu \sum_{j=1}^{S-1} \hat{U}_j \\
 \partial B_j / \partial t &= -\bar{k}_{\text{on}}^c B_j + k_{\text{off}}^c B_j^c + k_{\text{p}} B_{j-1} - (k_{\text{p}} + k_{\text{off}}) B_j + \bar{k}_{\text{on}} U_j \\
 \partial B_j^c / \partial t &= \bar{k}_{\text{on}}^c B_j - k_{\text{off}}^c B_j^c + k_{\text{p}} B_{j-1}^c - (k_{\text{p}} + k_{\text{off}}) B_j^c + \bar{k}_{\text{on}} U_j^c \\
 \partial U_j / \partial t &= -\bar{k}_{\text{on}}^c U_j + k_{\text{off}}^c U_j^c - (k_- + \bar{k}_{\text{on}} + \mu) U_j + k_+ M \hat{U}_j + k_{\text{off}} B_j \\
 \partial U_j^c / \partial t &= \bar{k}_{\text{on}}^c U_j - k_{\text{off}}^c U_j^c - (\bar{k}_{\text{on}} + \mu) U_j^c + k_{\text{off}} B_j^c \\
 \partial \hat{U}_j / \partial t &= k_- U_j - k_+ M \hat{U}_j - \mu \hat{U}_j \\
 \partial B_S / \partial t &= k_{\text{p}} B_{S-1} \\
 \partial B_S^c / \partial t &= k_{\text{p}} B_{S-1}^c
 \end{aligned}$$

where  $M$  is the pMHC concentration and all other parameters are defined in the main text. The probability of productive signaling through a single TCR is  $B_S + B_S^c$  and the probability that at least 1 TCR at the T cell-APC contact interface has transduced a productive signal is simply  $1 - (1 - B_S - B_S^c)^{7854}$ . We plot this quantity in Figure 5 in the main text. As an example, consider an endogenous pMHC with  $k_{\text{off}} = 5 \text{ s}^{-1}$  and  $k_{\text{on}} = 0.001 \mu\text{m}^{-2}$ . When  $\mu = 100 \text{ s}^{-1}$  this pMHC does not produce a productive signal (Figure 5C) despite forming  $\sim 100,000$  TCR/pMHC bonds during 30 s ( $= 1/(1/k_{\text{off}} + 1/(k_{\text{on}}[\text{pMHC}]))(7853 \text{ TCR})(30\text{s}) = 107,100$ ).
